# Supplementary material
Source: ML conference proceedings conference paper supplement (https://openaccess.thecvf.com/content/CVPR2026/html/Zhang_Think-as-You-See_Streaming_Chain-of-Thought_CVPR_2026_paper.html)
Supplement: Supplementary file 1 [file Zhang_Think-as-You-See_Streaming_Chain-of-Thought_CVPR_2026_supplemental.pdf]

# Think-as-You-See: Streaming Chain-of-Thought Reasoning for Large Vision-Language Models

## Supplementary Material

### A. Details of Streaming CoT Pipeline

#### A.1. CLIP-Guided Frame ID Alignment

**Step 1: Semantic anchoring before resampling.** Given a video  $\mathcal{V} = \{F_t\}_{t=1}^T$  with timestamps  $\{\tau_t\}_{t=1}^T$  and annotated keyframe captions  $\mathcal{C} = \{c_k\}_{k=1}^K$ , we first compute CLIP embeddings for all frames and captions:

$$\mathbf{f}_t = \text{Enc}_{\text{CLIP}}^{\text{img}}(F_t), \quad \mathbf{g}_k = \text{Enc}_{\text{CLIP}}^{\text{text}}(c_k).$$

We utilize cosine similarity throughout the alignment process:

$$\text{sim}(\mathbf{a}, \mathbf{b}) = \frac{\mathbf{a}^\top \mathbf{b}}{\|\mathbf{a}\| \|\mathbf{b}\|}.$$

For each keyframe caption  $c_k$ , we identify its most similar frame index:

$$t_k^* = \arg \max_{t \in \{1, \dots, T\}} \text{sim}(\mathbf{f}_t, \mathbf{g}_k),$$

recording the anchor timestamp  $\hat{\tau}_k = \tau_{t_k^*}$ . These anchors serve as semantic locks preserved during subsequent resampling.

**Step 2: Timestamp-based resampling at 2 FPS with anchor preservation.** Let the target sampling interval be  $\Delta = 0.5$  s (2 FPS) and the target grid be  $\{\tau_{t'}\}_{t'=1}^{T'}$  with  $\tau_{t'} = (t' - 1)\Delta$ . For each target timestamp  $\tau_{t'}$ , we select the frame  $F_{t'}$  as:

$$F_{t'} = \begin{cases} F_{t_k^*}, & \text{if } \tau_{t'} \in [\hat{\tau}_k - \epsilon, \hat{\tau}_k + \epsilon] \text{ for some } k, \\ \arg \min_{F_t} |\tau_t - \tau_{t'}|, & \text{otherwise,} \end{cases}$$

where  $\epsilon = 0.1$  s is a tolerance window ensuring every semantic anchor  $\hat{\tau}_k$  snaps to the nearest sampling point. Post-selection, frame indices are renormalized, and clips are truncated to the maximum input duration (30 s).

#### A.2. Quality Assurance and Temporal Filtering

To ensure generated frame-level trajectories are temporally grounded and semantically reliable, we apply a three-stage filtering process (Algorithm 1). First, we identify question-relevant keyframes via embedding similarity. Second, we prune temporally adjacent captions with redundant semantics to preserve distinct perceptual events. Finally, we format the supervision sequence by assigning  $\langle /EOT \rangle$  to selected keyframes and  $\langle \text{SKIP} \rangle$  to others. This yields a temporally sparse but well-aligned target stream, guiding the model to reason only at meaningful moments.

---

#### Algorithm 1 Quality Assurance and Temporal Filtering

---

**Require:** Question  $Q_t$ , keyframe captions  $\{c_k\}$

**Require:** Thresholds  $\tau_q = 0.7$ ,  $\tau_{\text{adj}} = 0.9$

**Step 1: Question–caption relevance screening**

```
1: for each caption  $c_k$  do
2:    $s_k \leftarrow \text{sim}(e(Q_t), e(c_k))$ 
3: end for
4:  $\mathcal{K}_t \leftarrow \{k \mid s_k \geq \tau_q\}$ 
```

**Step 2: Anti-redundancy temporal de-duplication**

```
5: Sort  $\mathcal{K}_t$  by time
6:  $\mathcal{K}_t^* \leftarrow []$ 
7: for each  $k$  in  $\mathcal{K}_t$  do
8:   if  $\mathcal{K}_t^*$  is empty then
9:     Append  $k$  to  $\mathcal{K}_t^*$ 
10:  else
11:    Let  $j$  be last element in  $\mathcal{K}_t^*$ 
12:     $s_{j,k} \leftarrow \text{sim}(e(c_j), e(c_k))$ 
13:    if  $s_{j,k} < \tau_{\text{adj}}$  then
14:      Append  $k$  to  $\mathcal{K}_t^*$ 
15:    end if
16:  end if
17: end for
```

**Step 3: Formatting supervision targets**

```
18: for each sampled frame index  $t'$  do
19:   if  $t' \in \mathcal{K}_t^*$  then
20:     Emit  $[R_{t'}] < /EOT >$ 
21:   else
22:     Emit  $\langle \text{SKIP} \rangle$ 
23:   end if
24: end for
```

---

#### A.3. Practical Notes

- **Embedding normalization.** All embeddings are  $\ell_2$ -normalized prior to similarity computation to stabilize thresholds.
- **Batching.** Frame and caption embeddings are computed in batches to mitigate I/O latency for long videos.
- **Hyperparameters.** Default values are  $\Delta = 0.5$  s,  $\epsilon = 0.1$  s,  $\tau_q = 0.7$ , and  $\tau_{\text{adj}} = 0.9$ , balancing temporal precision with retention of key semantic content.

#### A.4. Details of Dataset

The dataset spans 12 video reasoning tasks covering fine-grained event interpretation and high-level semantic understanding. As shown in Figure 8 and Table 3, the task distribution is long-tailed: *Causal Analysis* and *Event Dynamic*

*Analysis* dominate, while *Ingredient Analysis* and *Behavior Analysis* are less frequent. This reflects the natural prevalence of reasoning behaviors in real-world video content while ensuring broad coverage for multi-step reasoning evaluation.

Temporal structure also varies significantly. Figure 9 illustrates the distribution of keyframe counts, revealing a wide spectrum of temporal sparsity. Some videos contain sparse salient moments, while others feature dense, extended event sequences. This variability is critical for evaluating streaming reasoning, requiring models to adapt to varying event frequencies and accurately identify meaningful visual changes.

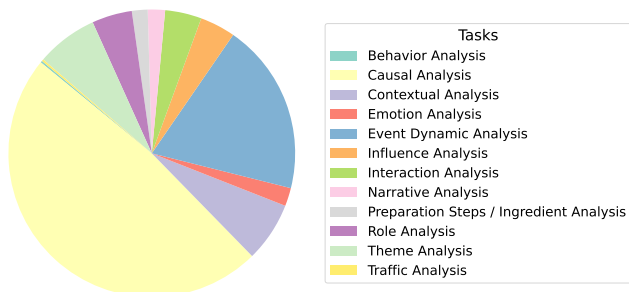

Figure 8. Task distribution in the dataset.

Table 3. Distribution of task categories in training and test sets.

| Task                                    | Train Set | Test Set |
|-----------------------------------------|-----------|----------|
| Causal Analysis                         | 52,566    | 208      |
| Event Dynamic Analysis                  | 18,675    | 82       |
| Preparation Steps / Ingredient Analysis | 2,252     | 74       |
| Theme Analysis                          | 6,206     | 33       |
| Interaction Analysis                    | 4,208     | 38       |
| Influence Analysis                      | 4,406     | 45       |
| Role Analysis                           | 4,843     | 31       |
| Emotion Analysis                        | 1,999     | 39       |
| Narrative Analysis                      | 1,755     | 35       |
| Contextual Analysis                     | 6,827     | 38       |
| Behavior Analysis                       | 227       | 12       |
| Traffic Analysis                        | 218       | 14       |

## B. Prompt Details

We present the complete prompts used in our pipeline, including QA construction (Figure 10), CoT inference (Figure 11), and subjective evaluation (Figure 12).

## C. Training Details

We train TaYS using a streaming-aware decoder-only objective, where visual and reasoning tokens are interleaved

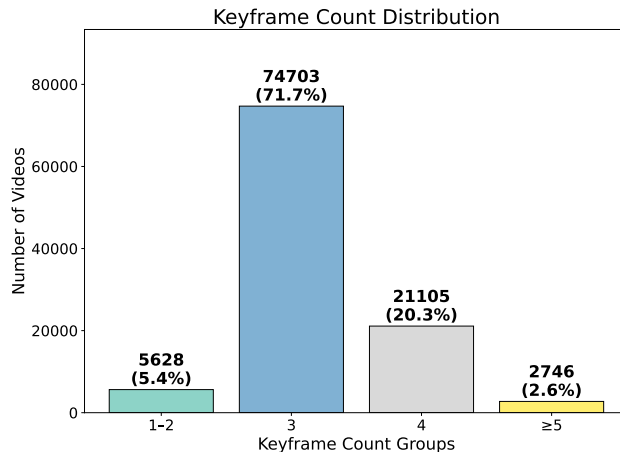

Figure 9. Distribution of keyframe counts per sample.

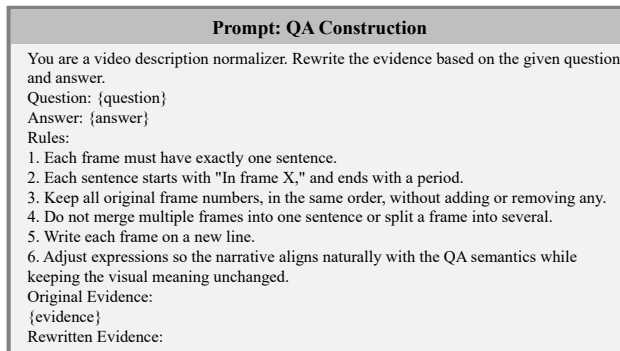

Figure 10. Prompt template for QA construction.

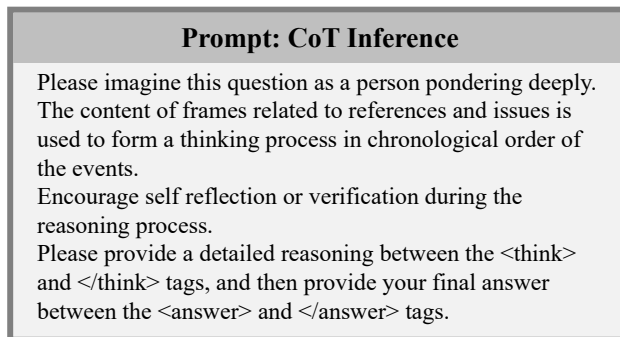

Figure 11. Prompt template for CoT inference.

with causal masking. Optimization employs AdamW with cosine decay, mixed-precision (bfloat16), gradient accumulation, activation checkpointing, and DeepSpeed ZeRO-3 for memory efficiency. The vision encoder remains frozen, while the multimodal projector and LLM backbone are fine-tuned. We regulate video token length via pixel-based constraints and train for two epochs with an effective sequence length of 8192 tokens.

| Prompt: Subjective Evaluation                                                                                                                                                                                                                                                                                                                                                                                                                                                                                                                                                                                                                                                                                                                                                                                                                                                                                                                                                                                                                                                                                                                                                                                                                                                                                                                                                                                                                                                                                                                                                      |
|------------------------------------------------------------------------------------------------------------------------------------------------------------------------------------------------------------------------------------------------------------------------------------------------------------------------------------------------------------------------------------------------------------------------------------------------------------------------------------------------------------------------------------------------------------------------------------------------------------------------------------------------------------------------------------------------------------------------------------------------------------------------------------------------------------------------------------------------------------------------------------------------------------------------------------------------------------------------------------------------------------------------------------------------------------------------------------------------------------------------------------------------------------------------------------------------------------------------------------------------------------------------------------------------------------------------------------------------------------------------------------------------------------------------------------------------------------------------------------------------------------------------------------------------------------------------------------|
| <p>You are an expert evaluation assistant. Your task is to compare three model outputs based on the given Question and the Ground-Truth Answer.</p> <p>First, carefully read the Question and the Ground-Truth Answer.</p> <p>Then evaluate each model output (A, B, and C) across the following four aspects:</p> <p>Evaluation Criteria (1–10 per dimension)</p> <p>Logic: Evaluate whether the reasoning is coherent, structured, and follows logically from the question. (1–2: illogical; 3–4: inconsistent; 5–6: partially logical; 7–8: mostly logical; 9–10: fully logical)</p> <p>Factuality: Check correctness and absence of factual errors relative to the ground-truth answer. (1–2: mostly incorrect; 3–4: major errors; 5–6: minor errors; 7–8: highly factual; 9–10: fully factual)</p> <p>Accuracy: Assess how precisely the model answers the question and matches the ground-truth answer. (1–2: irrelevant; 3–4: weak alignment; 5–6: partial correctness; 7–8: mostly accurate; 9–10: perfectly accurate)</p> <p>Conciseness: Evaluate clarity and brevity without unnecessary verbosity. (1–2: very verbose or incomplete; 3–4: unfocused; 5–6: somewhat concise; 7–8: concise; 9–10: extremely concise and clear)</p> <p>You should internally consider all four scores for each model to judge overall quality, but DO NOT output the scores.</p> <p>Instead, provide a final decision on which model output is best overall.</p> <p>Final Output Instruction</p> <p>Choose only ONE of the following responses: Best: A; Best: B; Best: C; Best: Tie;</p> |

Figure 12. Prompt template for subjective evaluation.

Table 4. Training hyperparameters for TaYS.

| Config                 | Value                        |
|------------------------|------------------------------|
| input resolution       | variable (pixel-constrained) |
| max token length       | 8192                         |
| vision encoder         | frozen                       |
| trainable modules      | LLM + MLP projector          |
| precision              | bfloat16                     |
| optimizer              | AdamW                        |
| learning rate          | $2 \times 10^{-5}$           |
| lr schedule            | cosine decay                 |
| warmup ratio           | 0.03                         |
| batch size             | 1 (grad accum = 16)          |
| epochs                 | 2                            |
| gradient clipping      | 1.0                          |
| gradient checkpointing | enabled                      |
| distributed training   | torchrun + ZeRO-3            |
| max video frames       | 60                           |
| video token budget     | 24K tokens (pixel-based)     |

## D. Evaluation Details

**Construction of Test Set.** Following the VideoEspresso protocol, we construct the test set with three distractor options per question. Distractors are designed to match the correct answer in contextual relevance and linguistic form while containing explicit factual inaccuracies, ensuring a discriminative evaluation. We apply the same answer-rewriting procedure as in training to maintain consistency.

**Objective Evaluation Protocol.** For each sample, we evaluate a free-form prediction  $\tilde{y}$  against a reference answer  $y^*$  and multiple-choice options  $\mathcal{O} = \{o_1, o_2, o_3, o_4\}$ , where  $o^*$  is the correct option. We use a semantic similarity function  $\text{sim}(\cdot, \cdot)$  with a threshold  $\tau = 0.8$ .

**Stage 1: Reference similarity.** We first compute  $s_{\text{ref}} = \text{sim}(\tilde{y}, y^*)$ . If  $s_{\text{ref}} < \tau$ , the prediction is deemed incorrect.

**Stage 2: Option discrimination.** We compute similari-

### Algorithm 2 Two-Stage Objective Evaluation

**Require:** Prediction  $\tilde{y}$ , reference answer  $y^*$ , options  $\mathcal{O} = \{o_1, o_2, o_3, o_4\}$ , correct option  $o^* \in \mathcal{O}$ , similarity function  $\text{sim}$ , threshold  $\tau$

- 1:  $s_{\text{ref}} \leftarrow \text{sim}(\tilde{y}, y^*)$
- 2: **if**  $s_{\text{ref}} < \tau$  **then**
- 3:     **return** INCORRECT
- 4: **end if**
- 5: **for each**  $o_j \in \mathcal{O}$  **do**
- 6:      $s_j \leftarrow \text{sim}(\tilde{y}, o_j)$
- 7: **end for**
- 8:  $s_{\text{opt}} \leftarrow \text{sim}(\tilde{y}, o^*)$
- 9:  $s_{\text{max}}^{\text{neg}} \leftarrow \max\{s_j : o_j \in \mathcal{O}, o_j \neq o^*\}$
- 10: **if**  $s_{\text{opt}} \geq \tau$  **and**  $s_{\text{opt}} > s_{\text{max}}^{\text{neg}}$  **then**
- 11:     **return** CORRECT
- 12: **else**
- 13:     **return** INCORRECT
- 14: **end if**

ties  $s_j = \text{sim}(\tilde{y}, o_j)$  for all options. Let  $s_{\text{opt}} = \text{sim}(\tilde{y}, o^*)$  and  $s_{\text{max}}^{\text{neg}} = \max_{o_j \neq o^*} s_j$ . A prediction is correct only if:

$$s_{\text{ref}} \geq \tau, \quad s_{\text{opt}} \geq \tau, \quad \text{and} \quad s_{\text{opt}} > s_{\text{max}}^{\text{neg}}.$$

**Latency Evaluation Protocol.** We quantify real-time performance using two metrics: **(1) Time to First Token (TTFT)**, measuring the interval between the arrival of the first frame and the emission of the first token; **(2) Overall Delay**, measuring the total time to complete reasoning and produce the final answer. All inferences run on identical hardware with token-level timing resolution to ensure fair comparison.
